# Supplementary material for: High-Fat Diet Modulates the Excitability of Neurons within the Brain–Liver Pathway
Source: MDPI journal article supplement (doi:10.3390/cells12081194), 2023-04-20
Supplement: s1 [file s1]

**A1**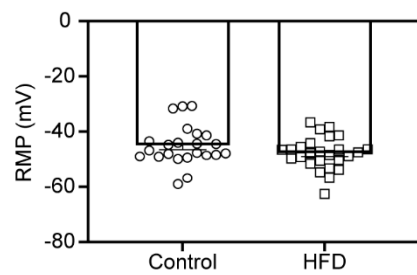**A2**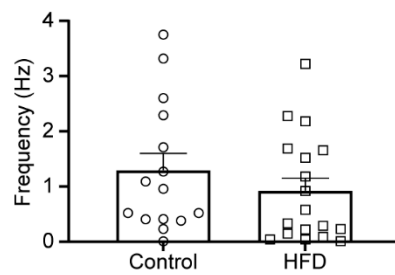**B1**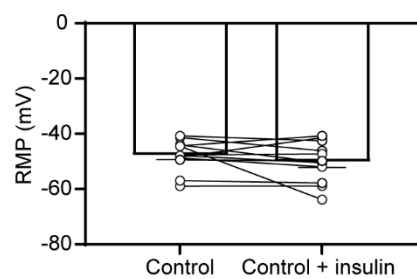**B2**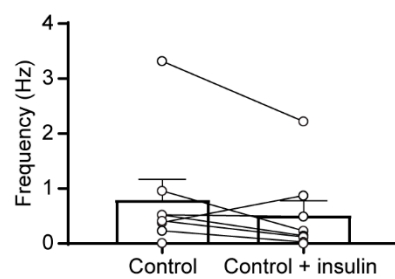**C1**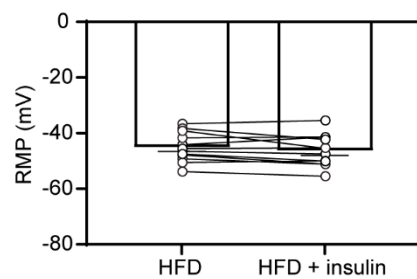**C2**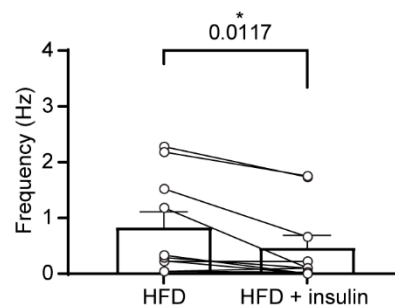**D1**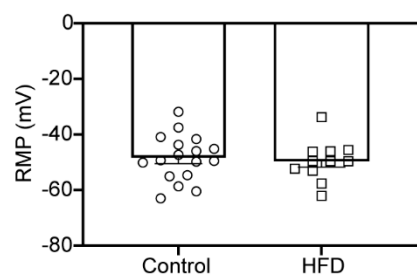**D2**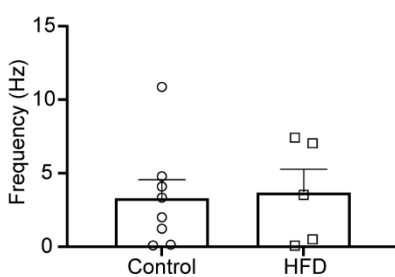

Figure S1: The effect of high-fat diet and insulin on the cellular properties of liver-related neurons.
